# Supplementary material for: Inferring Population Size History from Large Samples of Genome-Wide Molecular Data - An Approximate Bayesian Computation Approach
Source: PubMed Central journal article supplement (PMC4778914; doi:10.1371/journal.pgen.1005877), 2016-03-04

population size prediction error

1.0  
0.8  
0.6  
0.4  
0.2  
0.0

- genotype LD, all SNP
- haplotype LD, all SNP
- genotype LD, MAF 5%
- haplotype LD, MAF 5%
- genotype LD, MAF 10%
- haplotype LD, MAF 10%
- genotype LD, MAF 20%

0 10 100 1,000 10,000 100,000

generations before present (log scale)

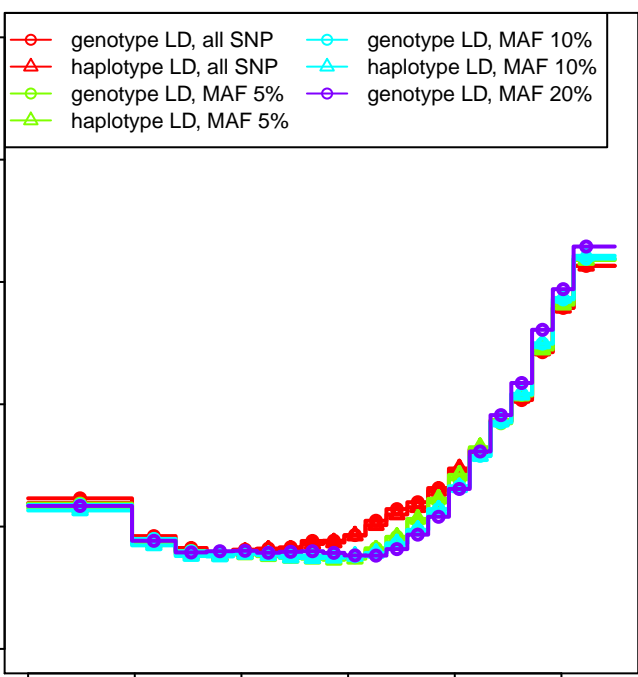

Supplement: pgen.1005877.s004.pdf [file pgen.1005877.s004.pdf]
