# Supplementary material for: Inferring Population Size History from Large Samples of Genome-Wide Molecular Data - An Approximate Bayesian Computation Approach
Source: PubMed Central journal article supplement (PMC4778914; doi:10.1371/journal.pgen.1005877), 2016-03-04

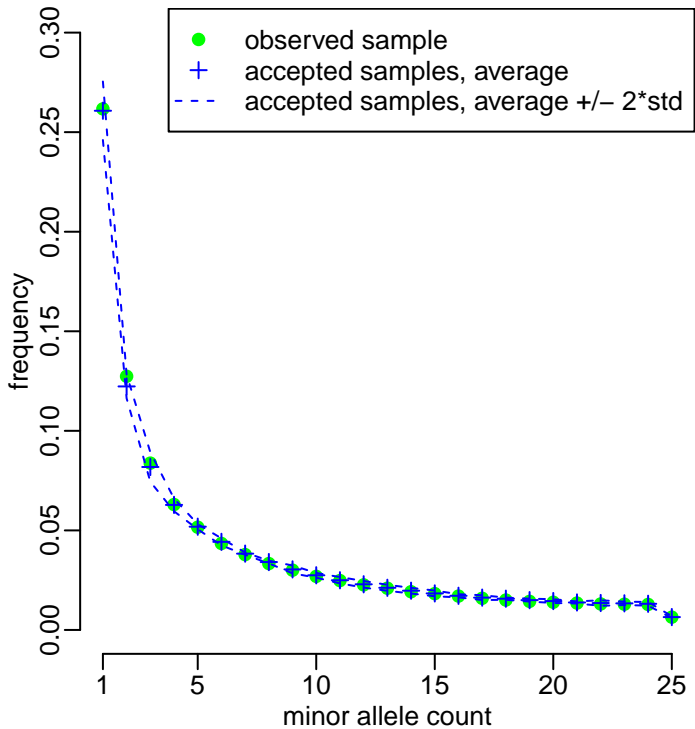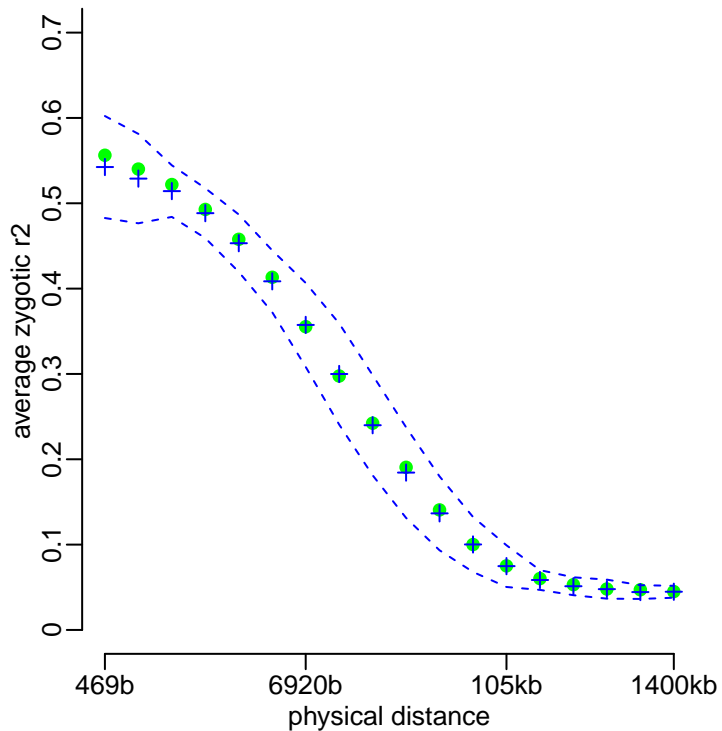

Supplement: pgen.1005877.s012.pdf [file pgen.1005877.s012.pdf]
